# Supplementary material
Source: PubMed Central journal article supplement (PMC7165212)
Supplement: 10278_2019_283_MOESM1_ESM.pdf [file 10278_2019_283_MOESM1_ESM.pdf]

# Image Quality Assessment

The quality of the image was assessed by the ability to perform **Detection** (presence or absence of pathology) and **Estimation** (including judgments about absolute or relative intensities within, or between anatomical structures in the image)

Overall visual quality of the image is assessed on the scale of 1 to 5 (1-unacceptable, 2-poor, 3-satisfactory, 4-good and 5-excellent).

| Image Sample | Image Quality Assessment |            |                     |
|--------------|--------------------------|------------|---------------------|
|              | Detection                | Estimation | Overall Performance |
| MRI_16Bit    |                          |            |                     |
| MR_16_01     | ✓                        | ✓          | 5                   |
| MR_16_02     | ✓                        | ✓          | 5                   |
| MR_16_03     | ✓                        | ✓          | 5                   |
| MR_16_04     | ✓                        | ✓          | 5                   |
| MR_16_05     | ✓                        | ✓          | 5                   |
| MR_16_06     | ✓                        | ✓          | 5                   |
| MR_16_08     | ✓                        | ✓          | 5                   |
| MR_16_10     | ✓                        | ✗          | 4                   |
| MR_16_12     | ✓                        | ✗          | 4                   |
| MR_16_14     | ✓                        | ✗          | 3                   |
| MR_16_16     | ✓                        | ✗          | 3                   |
| MR_16_18     | ✓                        | ✗          | 2                   |

| Image Sample | Image Quality Assessment |            |                     |
|--------------|--------------------------|------------|---------------------|
|              | Detection                | Estimation | Overall Performance |
| MRI_8Bit     |                          |            |                     |
| MR_8_01      | ✓                        | ✓          | 5                   |
| MR_8_02      | ✓                        | ✓          | 5                   |
| MR_8_03      | ✓                        | ✓          | 5                   |
| MR_8_04      | ✓                        | ✓          | 5                   |
| MR_8_05      | ✓                        | ✓          | 5                   |
| MR_8_06      | ✓                        | ✓          | 5                   |
| MR_8_08      | ✓                        | ✓          | 5                   |
| MR_8_10      | ✓                        | ✗          | 4                   |
| MR_8_12      | ✓                        | ✗          | 4                   |
| MR_8_14      | ✓                        | ✗          | 3                   |
| MR_8_16      | ✓                        | ✗          | 3                   |
| MR_8_18      | ✓                        | ✗          | 2                   |

| Image Sample | Image Quality Assessment |            |                     |
|--------------|--------------------------|------------|---------------------|
|              | Detection                | Estimation | Overall Performance |
| CT_16Bit     |                          |            |                     |
| CT_16_01     | ✓                        | ✓          | 5                   |
| CT_16_02     | ✓                        | ✓          | 5                   |
| CT_16_03     | ✓                        | ✓          | 5                   |
| CT_16_04     | ✓                        | ✓          | 5                   |
| CT_16_05     | ✓                        | ✓          | 5                   |
| CT_16_06     | ✓                        | ✓          | 5                   |
| CT_16_08     | ✓                        | ✓          | 5                   |
| CT_16_10     | ✓                        | ✓          | 5                   |
| CT_16_12     | ✓                        | ✗          | 4                   |
| CT_16_14     | ✓                        | ✗          | 3                   |
| CT_16_16     | ✓                        | ✗          | 2                   |
| CT_16_18     | ✓                        | ✗          | 2                   |

| Image Sample | Image Quality Assessment |            |                     |
|--------------|--------------------------|------------|---------------------|
|              | Detection                | Estimation | Overall Performance |
| CT_8Bit      |                          |            |                     |
| CT_8_01      | ✓                        | ✓          | 5                   |
| CT_8_02      | ✓                        | ✓          | 5                   |
| CT_8_03      | ✓                        | ✓          | 5                   |
| CT_8_04      | ✓                        | ✓          | 5                   |
| CT_8_05      | ✓                        | ✓          | 5                   |
| CT_8_06      | ✓                        | ✓          | 5                   |
| CT_8_08      | ✓                        | ✓          | 5                   |
| CT_8_10      | ✓                        | ✓          | 5                   |
| CT_8_12      | ✓                        | ✗          | 3                   |
| CT_8_14      | ✓                        | ✗          | 3                   |
| CT_8_16      | ✓                        | ✗          | 2                   |
| CT_8_18      | ✓                        | ✗          | 2                   |

Urvashi  
Ph.D (176008)  
ECE department  
JUIT, Wagnaghat, Distt. Solan (H.P)

  
 Radiologist  
 Ripon Hospital, Distt. Shimla, (H.P)  
**Radiologist**  
**DBUZH, Shimla**

| Image Sample | Image Quality Assessment |            |                     |
|--------------|--------------------------|------------|---------------------|
|              | Detection                | Estimation | Overall Performance |
| CT_512_8     |                          |            |                     |
| 01           | ✓                        | ✓          | 5                   |
| 02           | ✓                        | ✓          | 5                   |
| 03           | ✓                        | ✓          | 5                   |
| 04           | ✓                        | ✓          | 5                   |
| 05           | ✓                        | ✓          | 5                   |
| 06           | ✓                        | ✓          | 5                   |
| 08           | ✓                        | ✓          | 5                   |
| 10           | ✓                        | ✓          | 5                   |
| 12           | ✓                        | ✗          | 4                   |
| 14           | ✓                        | ✗          | 4                   |
| 16           | ✓                        | ✗          | 3                   |
| 18           | ✓                        | ✗          | 2                   |

| Image Sample | Image Quality Assessment |            |                     |
|--------------|--------------------------|------------|---------------------|
|              | Detection                | Estimation | Overall Performance |
| MR_256_8     |                          |            |                     |
| 01           | ✓                        | ✓          | 5                   |
| 02           | ✓                        | ✓          | 5                   |
| 03           | ✓                        | ✓          | 5                   |
| 04           | ✓                        | ✓          | 5                   |
| 05           | ✓                        | ✓          | 5                   |
| 06           | ✓                        | ✓          | 5                   |
| 08           | ✓                        | ✓          | 5                   |
| 10           | ✓                        | ✓          | 5                   |
| 12           | ✓                        | ✗          | 4                   |
| 14           | ✓                        | ✗          | 3                   |
| 16           | ✓                        | ✗          | 2                   |
| 18           | ✓                        | ✗          | 2                   |

| Image Sample | Image Quality Assessment |            |                     |
|--------------|--------------------------|------------|---------------------|
|              | Detection                | Estimation | Overall Performance |
| MR_512_8     |                          |            |                     |
| 01           | ✓                        | ✓          | 5                   |
| 02           | ✓                        | ✓          | 5                   |
| 03           | ✓                        | ✓          | 5                   |
| 04           | ✓                        | ✓          | 5                   |
| 05           | ✓                        | ✓          | 5                   |
| 06           | ✓                        | ✓          | 5                   |
| 08           | ✓                        | ✓          | 5                   |
| 10           | ✓                        | ✓          | 5                   |
| 12           | ✓                        | ✗          | 4                   |
| 14           | ✓                        | ✗          | 3                   |
| 16           | ✓                        | ✗          | 3                   |
| 18           | ✓                        | ✗          | 2                   |

| Image Sample | Image Quality Assessment |            |                     |
|--------------|--------------------------|------------|---------------------|
|              | Detection                | Estimation | Overall Performance |
| MR_R         |                          |            |                     |
| 01           | ✓                        | ✓          | 5                   |
| 02           | ✓                        | ✓          | 5                   |
| 03           | ✓                        | ✓          | 5                   |
| 04           | ✓                        | ✓          | 5                   |
| 05           | ✓                        | ✓          | 5                   |
| 06           | ✓                        | ✓          | 5                   |
| 08           | ✓                        | ✓          | 5                   |
| 10           | ✓                        | ✗          | 4                   |
| 12           | ✓                        | ✗          | 4                   |
| 14           | ✓                        | ✗          | 3                   |
| 16           | ✓                        | ✗          | 2                   |
| 18           | ✓                        | ✗          | 2                   |

Urvashi  
 Ph.D (176008)  
 ECE department  
 JUIT, Wagnaghat, Distt. Solan (H.P)

  
 Radiologist  
 Ripon Hospital, Distt. Shimla, (H.P)  
 SDOZE, Solan

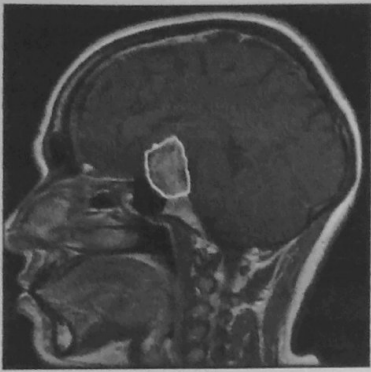

MR\_8\_01

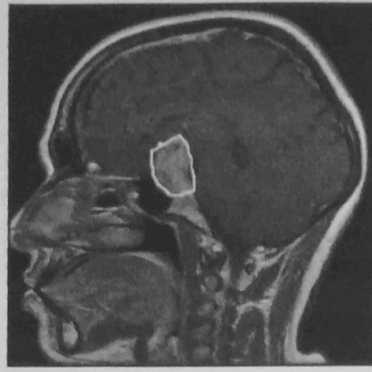

MR\_8\_02

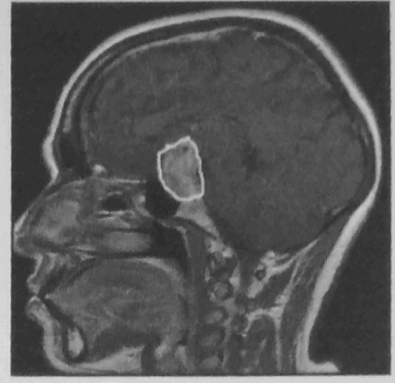

MR\_8\_03

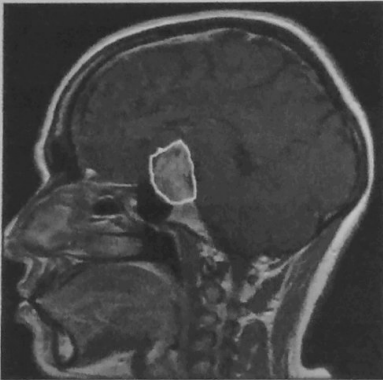

MR\_8\_04

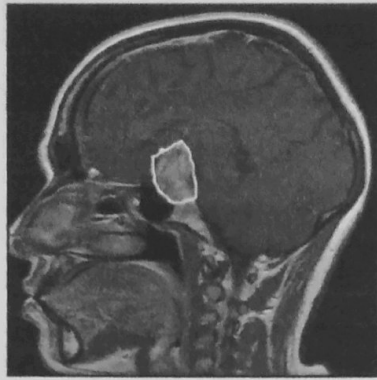

MR\_8\_05

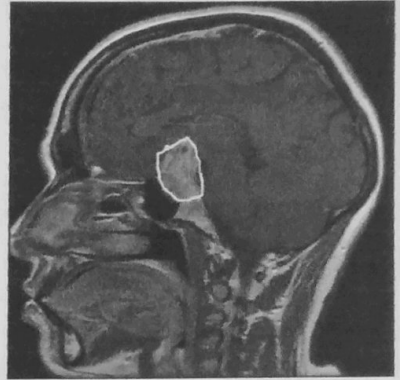

MR\_8\_06

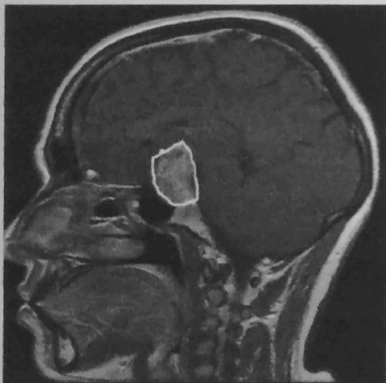

MR\_8\_08

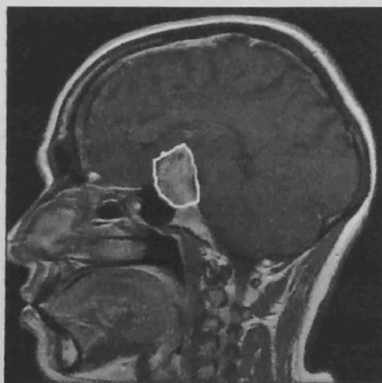

MR\_8\_10

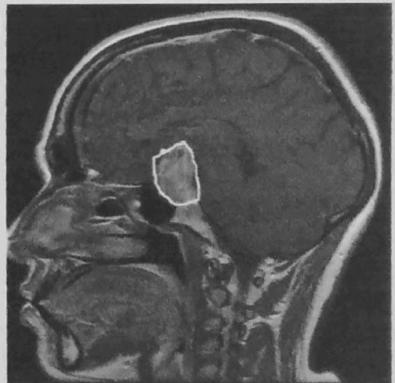

MR\_8\_12

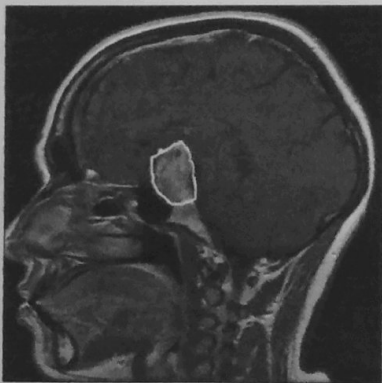

MR\_8\_14

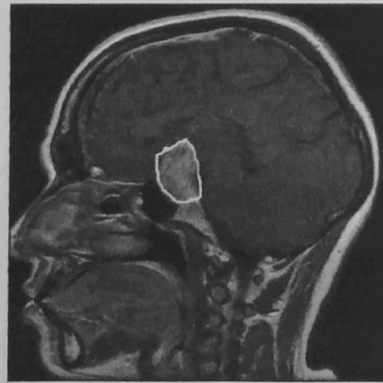

MR\_8\_16

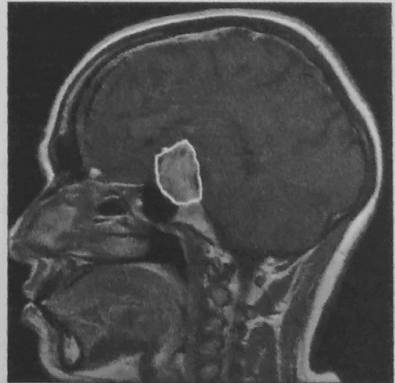

MR\_8\_18

*CSH*  
Radiologist  
RDUZH, Shinya

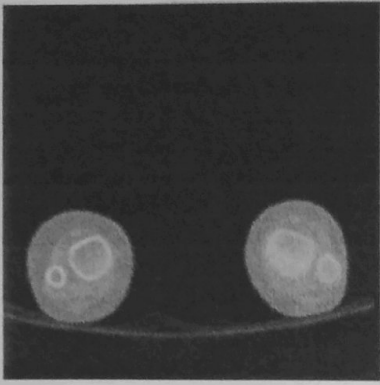

CT\_8\_01

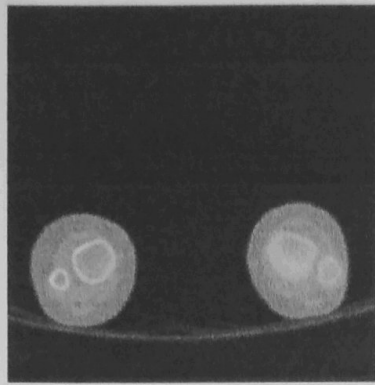

CT\_8\_02

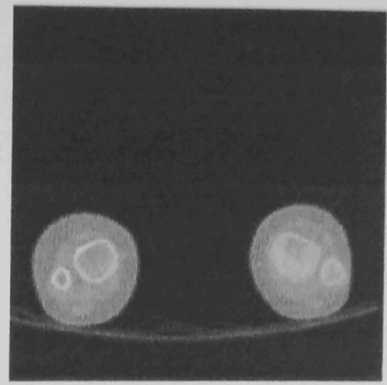

CT\_8\_03

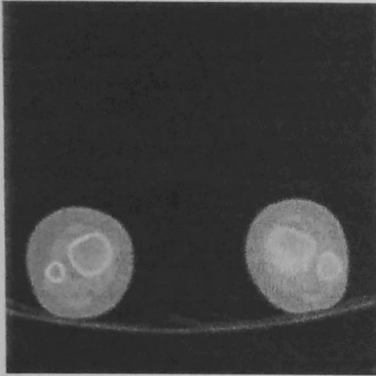

CT\_8\_04

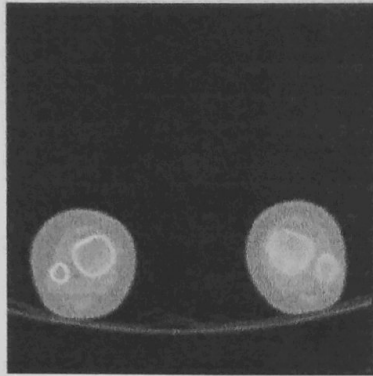

CT\_8\_05

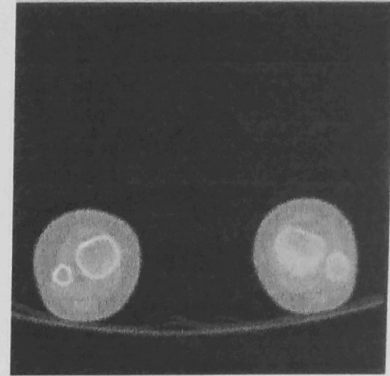

CT\_8\_06

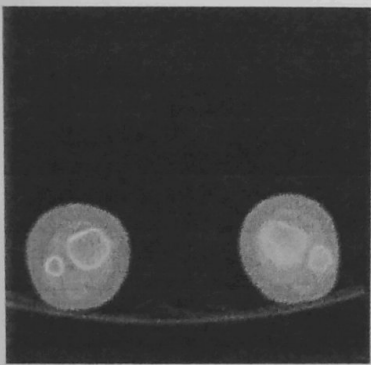

CT\_8\_08

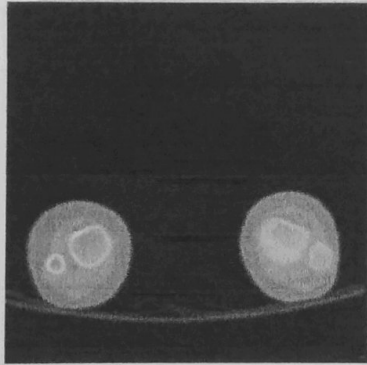

CT\_8\_10

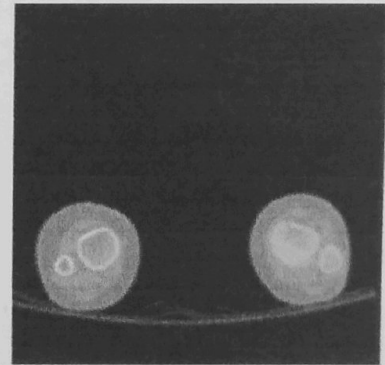

CT\_8\_12

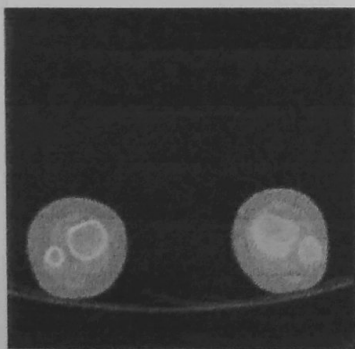

CT\_8\_14

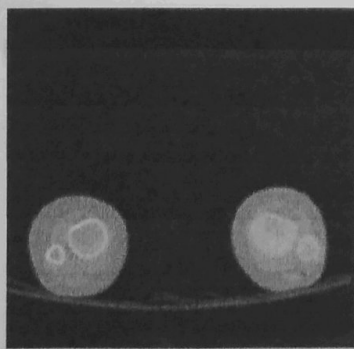

CT\_8\_16

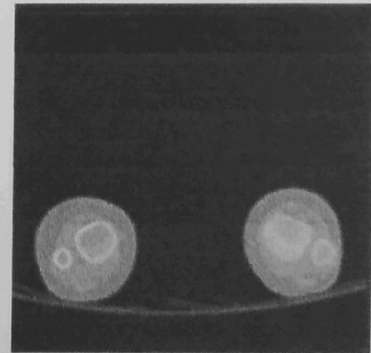

CT\_8\_18

*Ali*  
Radiologist  
DDUZH, Shimla

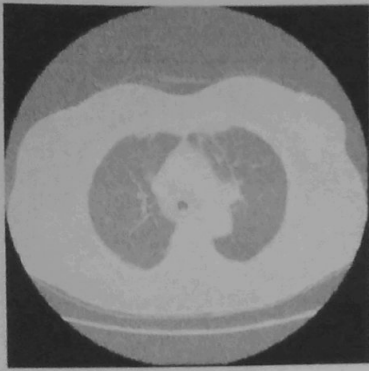

CT\_16\_01

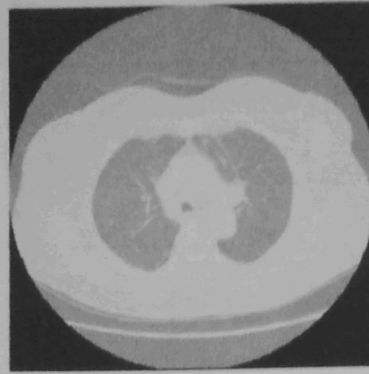

CT\_16\_02

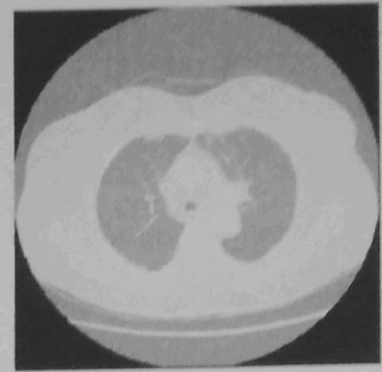

CT\_16\_03

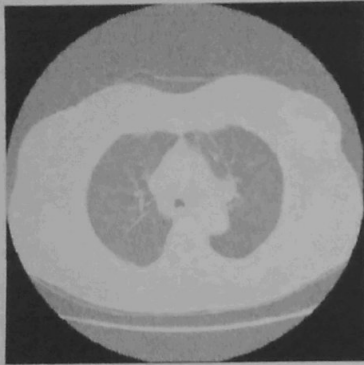

CT\_16\_04

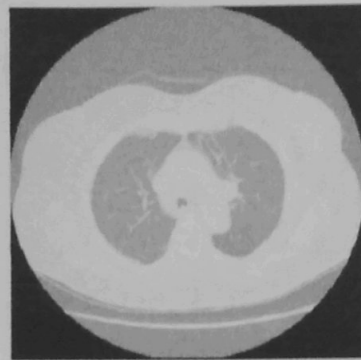

CT\_16\_05

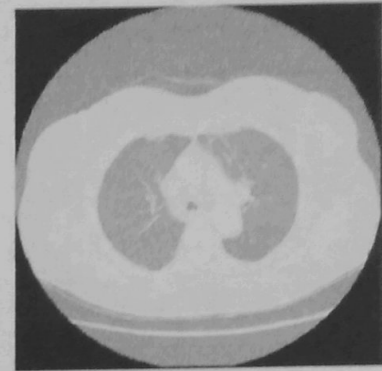

CT\_16\_06

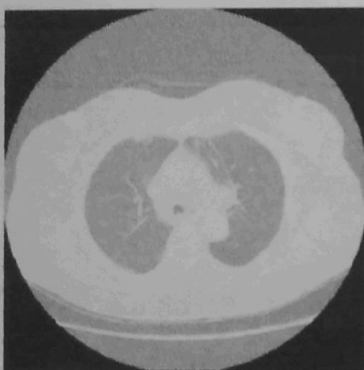

CT\_16\_08

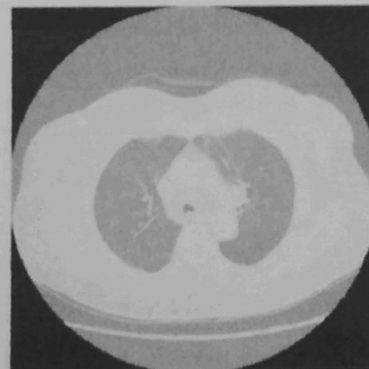

CT\_16\_10

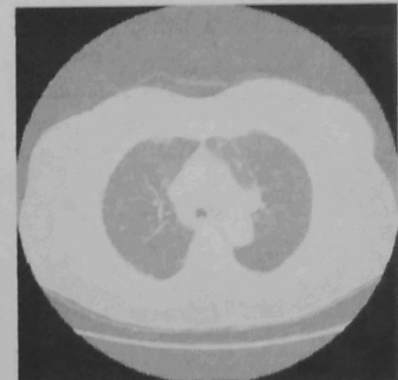

CT\_16\_12

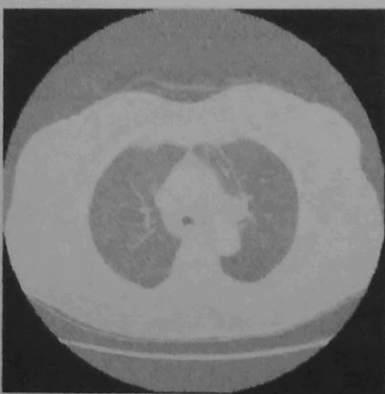

CT\_16\_14

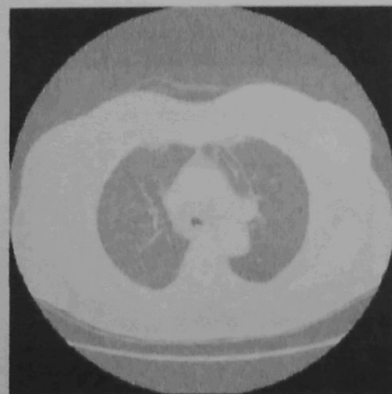

CT\_16\_16

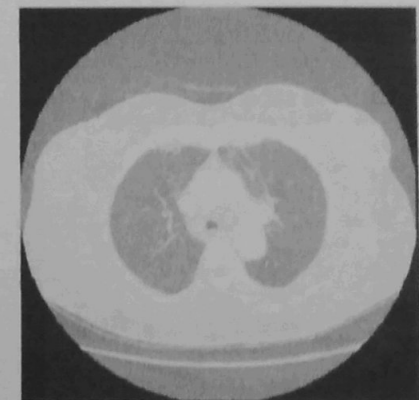

CT\_16\_18

*Ali*  
Radiologist  
DPUZH, Shimla

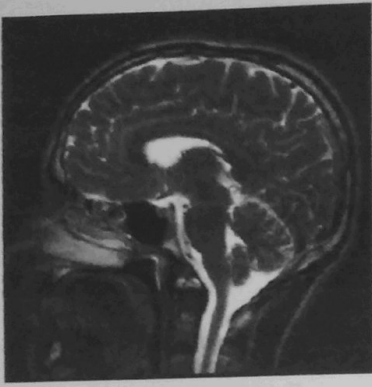

MR\_16\_01

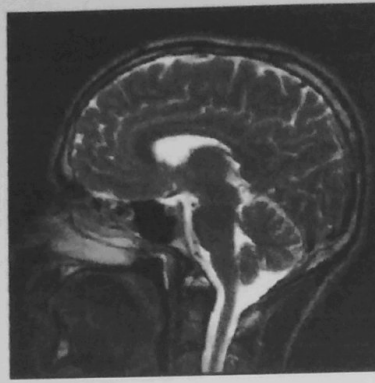

MR\_16\_02

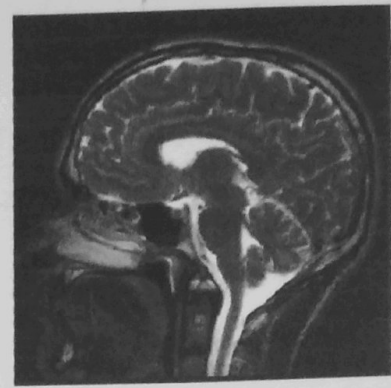

MR\_16\_03

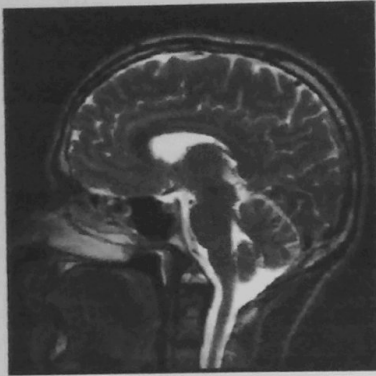

MR\_16\_04

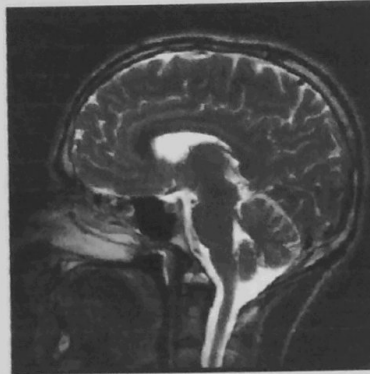

MR\_16\_05

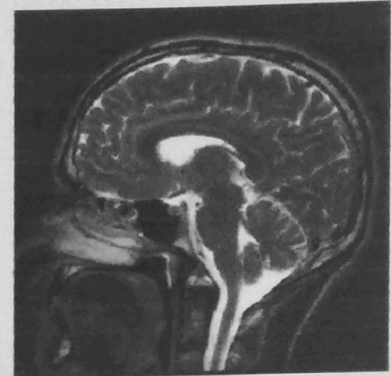

MR\_16\_06

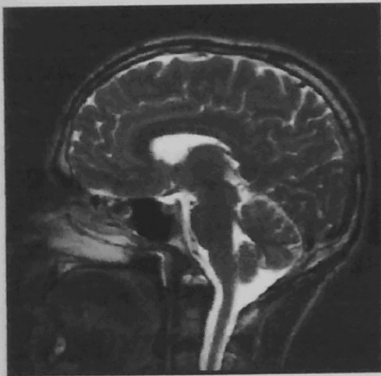

MR\_16\_08

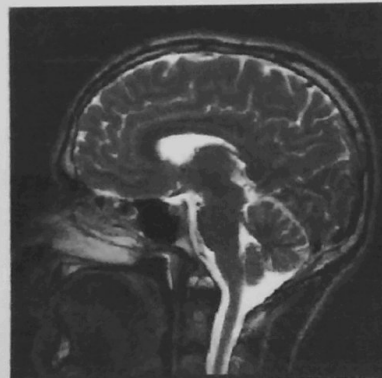

MR\_16\_10

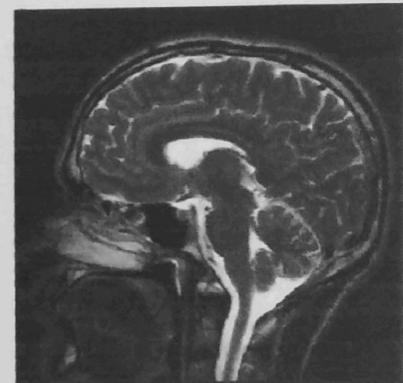

MR\_16\_12

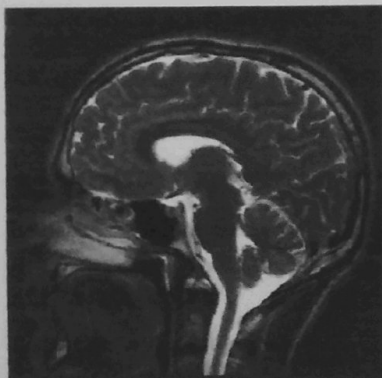

MR\_16\_14

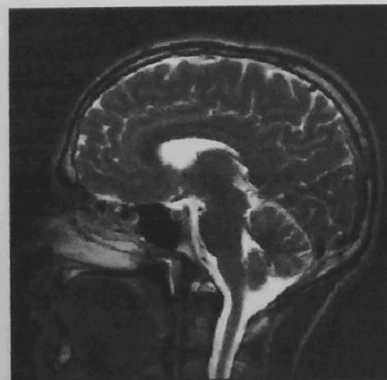

MR\_16\_16

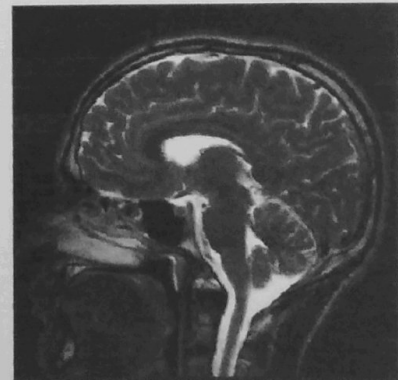

MR\_16\_18

*Asr*  
 Radiologist  
 PDUZH, Shimla

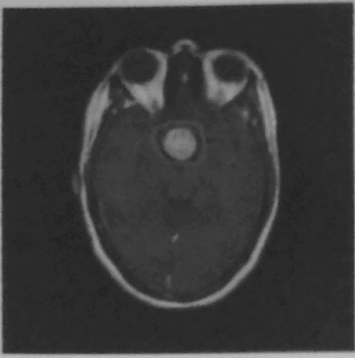

MR\_R\_01

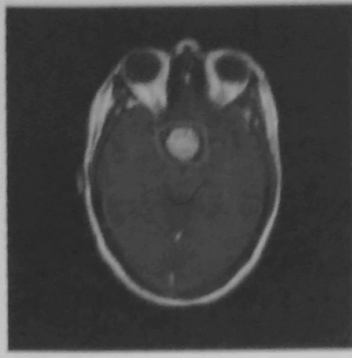

MR\_R\_02

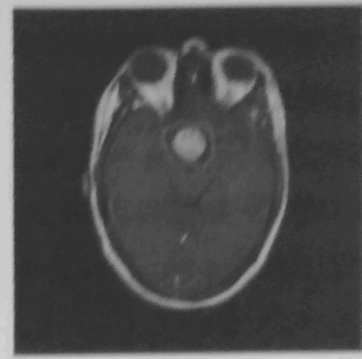

MR\_R\_03

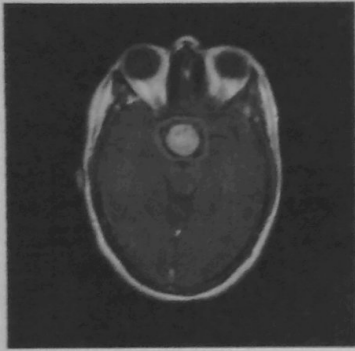

MR\_R\_04

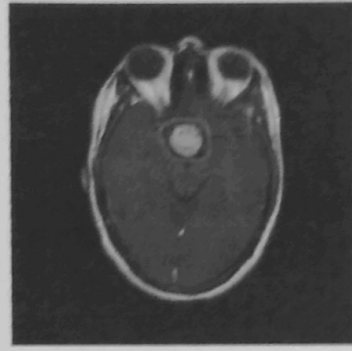

MR\_R\_05

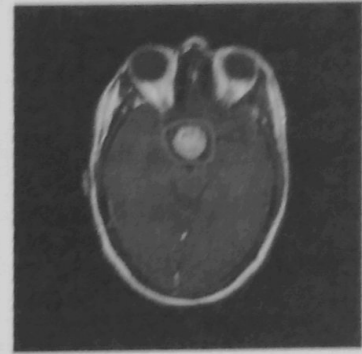

MR\_R\_06

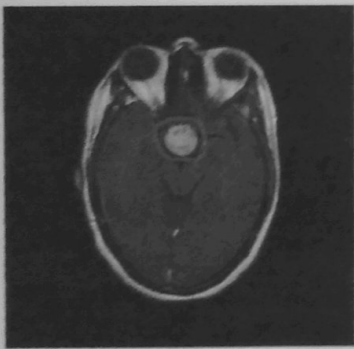

MR\_R\_08

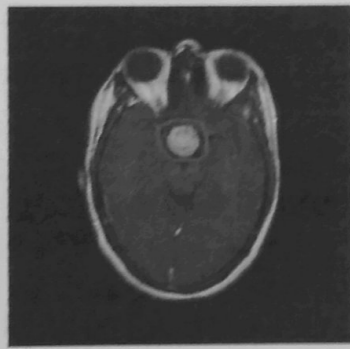

MR\_R\_10

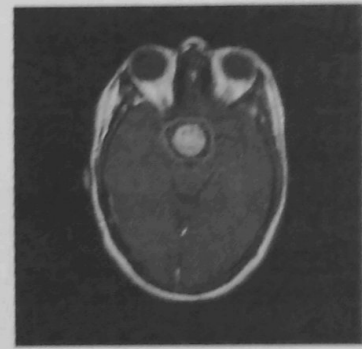

MR\_R\_12

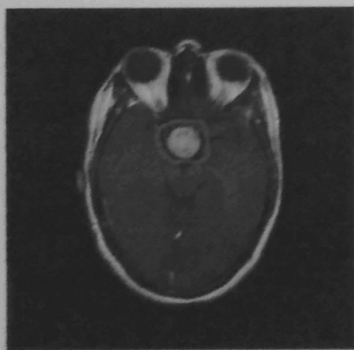

MR\_R\_14

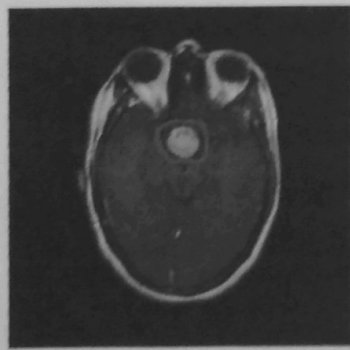

MR\_R\_16

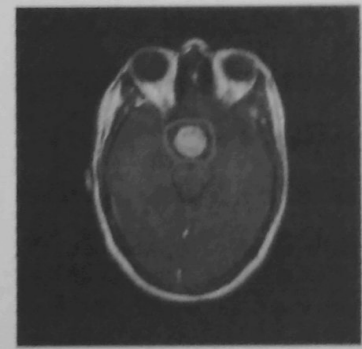

MR\_R\_18

Radiologist  
DDUZH, Shimla

TO WHOMSOEVER IT MAY CONCERN

Date: 21 Jun 2019

It is certified that volumetric medical image data of MRI and CT of various modalities are checked for quantization levels for good recovery and reconstruction of compressed medical images. The quality of the image was assessed by the ability to perform Detection (presence or absence of pathology) and Estimation (including judgments about absolute or relative intensities within, or between anatomical structures in the image) of the images worked upon by research scholar Ms. Urvashi Sharma of ECE Department, Jaypee University of Information Technology, Distt. Solan under the supervision of Dr. Meenakshi Sood and Dr. Emjee Puthooran.

Signature of the Radiologist

(Name and stamp)

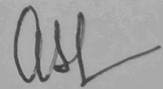

**Radiologist**  
**DDUZH, Shimla**
